# Supplementary material
Source: PubMed Central journal article supplement (PMC545901)

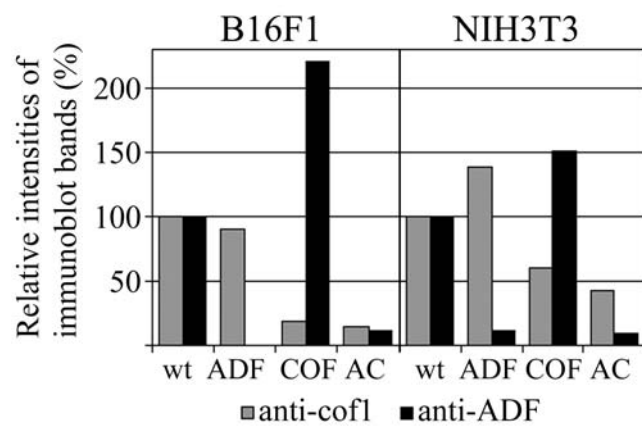

Supplement: mbc_E04-07-0555_1.pdf [file mbc_E04-07-0555_1.pdf]
